# Supplementary material for: CsI:Tl+,Yb2+: ultra-high light yield scintillator with reduced afterglow
Source: Royal Society of Chemistry journal article supplement (doi:10.1039/c3ce42645a), 2014-01-01
Supplement: c3ce42645a.pdf [file c3ce42645a.pdf]

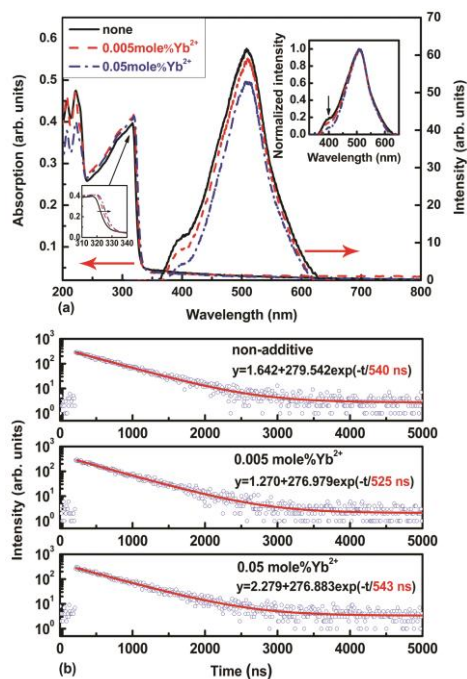

Optical absorption spectra and X-ray excited luminescence spectra of CsI:Tl *group A* crystals (a); Their photoluminescence decay profiles, monitoring at  $\lambda_{\text{ex}}=322$  nm and  $\lambda_{\text{em}}=520$  nm (b).

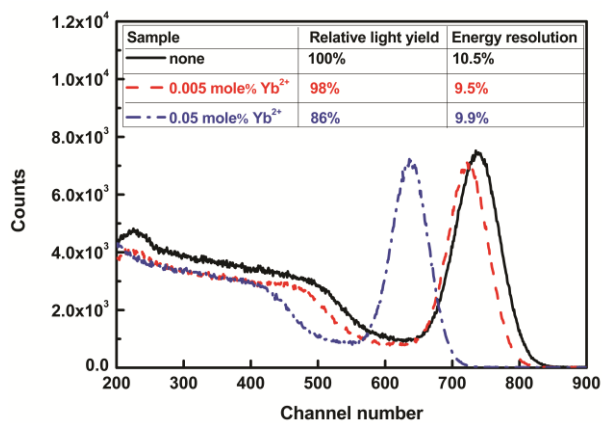

Pulse height spectra of CsI:Tl *group A* crystals, when excited with a <sup>137</sup>Cs source. The inset is the derived relative light yield and energy resolution.
